# Supplementary material
Source: PubMed Central journal article supplement (PMC6329589)
Supplement: NIHMS1503192-supplement-11.pdf [file NIHMS1503192-supplement-11.pdf]

## **SUPPLEMENTAL TABLE TITLES AND LEGENDS**

### **Table S1. Related to Figure 1. High-confidence set of *Mtb* secreted proteins.**

*Mtb* culture filtrates separated by SDS-PAGE (Figure S1A) were subjected to LC-MS/MS analysis to identify secreted proteins. These results were manually curated to remove known cytoplasmic or cell-wall contaminants (Målen et al., 2007).

### **Table S2. Related to Figure 1. Comparison of U937 and 293T co-purifying proteins.**

To evaluate the impact of addition of U937 macrophage cell lysates to our PPI scheme (Figure 1A), a subset of bacterial proteins were re-analyzed by AP-MS using 293T lysate alone without inclusion of the U937 lysate. All these interactions were scored by MiST and those with values  $\geq 0.7$  are displayed.

### **Table S3. Related to Figure 1. Full AP-MS dataset.**

All host proteins identified from the AP-MS proteomics pipeline described in this study (Figure 1).

### **Table S4. Related to Figure 1. MiST scoring of AP-MS dataset.**

### **Table S5. Related to Figure 2. Comparison of AP-MS datasets from different pathogens.**

**Table S6. Related to Figure 2. Functional annotation of high-confidence interacting host proteins.**

DAVID v6.8 Uniprot keywords analysis was used to annotate all host proteins with MiST  $\geq 0.7$  for the indicated pathogens.

**Table S7. Related to Figure 2. Evolutionary analysis of *Mtb*-interacting proteins.**

SnIPRE and iHS analysis data.

**Table S8. Related to Figure 4. PTMs of host proteins during infection with *Mtb*.**

**Table S9. Related to Methods. Oligonucleotides, DNA barcodes, and complementation sequences.**
